# Supplementary material for: Video observation of hand hygiene practices during routine companion animal appointments and the effect of a poster intervention on hand hygiene compliance
Source: PubMed Central journal article supplement (PMC4108058; doi:10.1186/1746-6148-10-106), 2014-05-07
Supplement: 1746-6148-10-106-S8.pdf [file 1746-6148-10-106-S8.pdf]

**Additional file 8:** All contrasts of associations for variables included in the final multivariable random effects logistic regression model for observed hand hygiene compliance for opportunities associated with routine companion animal appointments at 38 veterinary clinics in Ontario (n = 10894)

| Variable             | Interaction           | Comparison                                                 | OR          | 95% CI       |              | p-value           |
|----------------------|-----------------------|------------------------------------------------------------|-------------|--------------|--------------|-------------------|
|                      |                       |                                                            |             | Lower        | Upper        |                   |
| Posters              | -                     | Absent vs present                                          | 1.04        | 0.91         | 1.19         | 0.5347            |
| <b>Recording day</b> | -                     | <b>Per 1 day increase</b>                                  | <b>1.04</b> | <b>1.002</b> | <b>1.087</b> | <b>0.0408</b>     |
| Room*role            | Exam room             | <b>Other vs veterinarian</b>                               | <b>0.27</b> | <b>0.19</b>  | <b>0.39</b>  | <b>&lt;0.0001</b> |
|                      |                       | <b>Other vs technician</b>                                 | <b>0.58</b> | <b>0.40</b>  | <b>0.85</b>  | <b>0.0053</b>     |
|                      |                       | <b>Veterinarian vs technician</b>                          | <b>2.15</b> | <b>1.80</b>  | <b>2.56</b>  | <b>&lt;0.0001</b> |
|                      | Backroom              | <b>Other vs veterinarian</b>                               | <b>0.21</b> | <b>0.05</b>  | <b>0.94</b>  | <b>0.0408</b>     |
|                      |                       | <b>Other vs technician</b>                                 | <b>0.19</b> | <b>0.04</b>  | <b>0.83</b>  | <b>0.0271</b>     |
|                      |                       | Veterinarian vs technician                                 | 0.90        | 0.63         | 1.28         | 0.5522            |
|                      | Exam room vs backroom | Other                                                      | 0.72        | 0.15         | 3.34         | 0.6723            |
|                      |                       | <b>Veterinarian</b>                                        | <b>0.56</b> | <b>0.38</b>  | <b>0.83</b>  | <b>0.0036</b>     |
|                      |                       | <b>Technician</b>                                          | <b>0.23</b> | <b>0.15</b>  | <b>0.35</b>  | <b>&lt;0.0001</b> |
| Gender*HH opp type   | Male                  | <b>Before patient contact vs before “clean” procedure</b>  | <b>9.16</b> | <b>2.02</b>  | <b>41.56</b> | <b>0.0041</b>     |
|                      |                       | <b>Before patient contact vs after “dirty” procedure</b>   | <b>0.10</b> | <b>0.05</b>  | <b>0.19</b>  | <b>&lt;0.0001</b> |
|                      |                       | <b>Before patient contact vs after glove removal</b>       | <b>0.10</b> | <b>0.04</b>  | <b>0.24</b>  | <b>&lt;0.0001</b> |
|                      |                       | <b>Before patient contact vs after patient contact</b>     | <b>0.14</b> | <b>0.09</b>  | <b>0.22</b>  | <b>&lt;0.0001</b> |
|                      |                       | <b>Before “clean” procedure vs after “dirty” procedure</b> | <b>0.01</b> | <b>0.002</b> | <b>0.05</b>  | <b>&lt;0.0001</b> |
|                      |                       | <b>Before “clean” procedure vs after glove removal</b>     | <b>0.01</b> | <b>0.002</b> | <b>0.06</b>  | <b>&lt;0.0001</b> |
|                      |                       | <b>Before “clean” procedure vs after patient contact</b>   | <b>0.02</b> | <b>0.004</b> | <b>0.07</b>  | <b>&lt;0.0001</b> |
|                      |                       | After “dirty” procedure vs after glove removal             | 1.08        | 0.43         | 2.68         | 0.8761            |
|                      |                       | After “dirty” procedure vs after patient contact           | 1.51        | 0.85         | 2.69         | 0.1575            |
|                      |                       | After glove removal vs after patient contact               | 1.41        | 0.65         | 3.03         | 0.3824            |
|                      |                       | Before patient contact vs before “clean” procedure         | 1.40        | 0.81         | 2.42         | 0.2263            |

| Variable              | Interaction    | Comparison                                                 | OR          | 95% CI       |             | p-value           |
|-----------------------|----------------|------------------------------------------------------------|-------------|--------------|-------------|-------------------|
|                       |                |                                                            |             | Lower        | Upper       |                   |
| Gender*HH<br>opp type | Female         | <b>Before patient contact vs after “dirty” procedure</b>   | <b>0.05</b> | <b>0.03</b>  | <b>0.08</b> | <b>&lt;0.0001</b> |
|                       |                | <b>Before patient contact vs after glove removal</b>       | <b>0.03</b> | <b>0.02</b>  | <b>0.06</b> | <b>&lt;0.0001</b> |
|                       |                | <b>Before patient contact vs after patient contact</b>     | <b>0.07</b> | <b>0.05</b>  | <b>0.09</b> | <b>&lt;0.0001</b> |
|                       |                | <b>Before “clean” procedure vs after “dirty” procedure</b> | <b>0.04</b> | <b>0.02</b>  | <b>0.07</b> | <b>&lt;0.0001</b> |
|                       |                | <b>Before “clean” procedure vs after glove removal</b>     | <b>0.02</b> | <b>0.01</b>  | <b>0.05</b> | <b>&lt;0.0001</b> |
|                       |                | <b>Before “clean” procedure vs after patient contact</b>   | <b>0.05</b> | <b>0.03</b>  | <b>0.08</b> | <b>&lt;0.0001</b> |
|                       |                | After “dirty” procedure vs after glove removal             | 0.68        | 0.37         | 1.26        | 0.2172            |
|                       |                | After “dirty” procedure vs after patient contact           | 1.40        | 0.93         | 2.09        | 0.1052            |
|                       |                | <b>After glove removal vs after patient contact</b>        | <b>2.06</b> | <b>1.23</b>  | <b>3.43</b> | <b>0.0057</b>     |
|                       | Male vs female | Before patient contact                                     | 1.21        | 0.79         | 1.83        | 0.3784            |
|                       |                | <b>Before “clean” procedure</b>                            | <b>0.18</b> | <b>0.04</b>  | <b>0.80</b> | <b>0.0244</b>     |
|                       |                | After “dirty” procedure                                    | 0.62        | 0.37         | 1.05        | 0.0749            |
|                       |                | <b>After glove removal</b>                                 | <b>0.39</b> | <b>0.18</b>  | <b>0.88</b> | <b>0.0224</b>     |
|                       |                | <b>After patient contact</b>                               | <b>0.57</b> | <b>0.46</b>  | <b>0.71</b> | <b>&lt;0.0001</b> |
| Room*HH<br>opp type   | Exam room      | <b>Before patient contact vs before “clean” procedure</b>  | <b>4.12</b> | <b>1.91</b>  | <b>8.90</b> | <b>0.0003</b>     |
|                       |                | <b>Before patient contact vs after “dirty” procedure</b>   | <b>0.12</b> | <b>0.09</b>  | <b>0.17</b> | <b>&lt;0.0001</b> |
|                       |                | <b>Before patient contact vs after glove removal</b>       | <b>0.08</b> | <b>0.05</b>  | <b>0.13</b> | <b>&lt;0.0001</b> |
|                       |                | <b>Before patient contact vs after patient contact</b>     | <b>0.08</b> | <b>0.07</b>  | <b>0.10</b> | <b>&lt;0.0001</b> |
|                       |                | <b>Before “clean” procedure vs after “dirty” procedure</b> | <b>0.03</b> | <b>0.01</b>  | <b>0.07</b> | <b>&lt;0.0001</b> |
|                       |                | <b>Before “clean” procedure vs after glove removal</b>     | <b>0.02</b> | <b>0.008</b> | <b>0.04</b> | <b>&lt;0.0001</b> |
|                       |                | <b>Before “clean” procedure vs after patient contact</b>   | <b>0.02</b> | <b>0.01</b>  | <b>0.04</b> | <b>&lt;0.0001</b> |
|                       |                | After “dirty” procedure vs after glove removal             | 0.63        | 0.38         | 1.03        | 0.0669            |

| Variable         | Interaction                    | Comparison                                                 | OR                     | 95% CI       |             | p-value           |
|------------------|--------------------------------|------------------------------------------------------------|------------------------|--------------|-------------|-------------------|
|                  |                                |                                                            |                        | Lower        | Upper       |                   |
| Room*HH opp type | Exam room                      | <b>After “dirty” procedure vs after patient contact</b>    | <b>0.67</b>            | <b>0.51</b>  | <b>0.89</b> | <b>0.0054</b>     |
|                  |                                | After glove removal vs after patient contact               | 1.07                   | 0.69         | 1.66        | 0.7631            |
|                  | Backroom                       | Before patient contact vs before “clean” procedure         | 3.11                   | 0.95         | 10.21       | 0.0614            |
|                  |                                | <b>Before patient contact vs after “dirty” procedure</b>   | <b>0.04</b>            | <b>0.02</b>  | <b>0.09</b> | <b>&lt;0.0001</b> |
|                  |                                | <b>Before patient contact vs after glove removal</b>       | <b>0.04</b>            | <b>0.02</b>  | <b>0.12</b> | <b>&lt;0.0001</b> |
|                  |                                | <b>Before patient contact vs after patient contact</b>     | <b>0.12</b>            | <b>0.07</b>  | <b>0.20</b> | <b>&lt;0.0001</b> |
|                  |                                | <b>Before “clean” procedure vs after “dirty” procedure</b> | <b>0.01</b>            | <b>0.003</b> | <b>0.05</b> | <b>&lt;0.0001</b> |
|                  |                                | <b>Before “clean” procedure vs after glove removal</b>     | <b>0.01</b>            | <b>0.004</b> | <b>0.06</b> | <b>&lt;0.0001</b> |
|                  |                                | <b>Before “clean” procedure vs after patient contact</b>   | <b>0.04</b>            | <b>0.01</b>  | <b>0.12</b> | <b>&lt;0.0001</b> |
|                  |                                | After “dirty” procedure vs after glove removal             | 1.17                   | 0.39         | 3.45        | 0.07818           |
|                  |                                | <b>After “dirty” procedure vs after patient contact</b>    | <b>3.15</b>            | <b>1.49</b>  | <b>6.70</b> | <b>0.0028</b>     |
|                  |                                | <b>After glove removal vs after patient contact</b>        | <b>2.71</b>            | <b>1.13</b>  | <b>6.50</b> | <b>0.0261</b>     |
|                  |                                | Exam room vs backroom                                      | Before patient contact | 0.64         | 0.31        | 1.29              |
|                  | Before “clean” procedure       |                                                            | 0.48                   | 0.16         | 1.42        | 0.1863            |
|                  | <b>After “dirty” procedure</b> |                                                            | <b>0.19</b>            | <b>0.08</b>  | <b>0.48</b> | <b>0.0004</b>     |
|                  | After glove removal            |                                                            | 0.36                   | 0.13         | 1.03        | 0.0574            |
|                  | After patient contact          |                                                            | 0.91                   | 0.54         | 1.54        | 0.7278            |

OR=odds ratio, CI=confidence interval, HH opp=hand hygiene opportunity  
Statistically significant contrasts (p<0.05) are in **boldface**
