# Supplementary material for: Video observation of hand hygiene practices during routine companion animal appointments and the effect of a poster intervention on hand hygiene compliance
Source: PubMed Central journal article supplement (PMC4108058; doi:10.1186/1746-6148-10-106), 2014-05-07

**Additional file 9:** Histogram and normal quantile plot for residuals of the final multivariable random effects linear regression model for product contact time at the sample level (hand hygiene attempt) after log transformation of the outcome

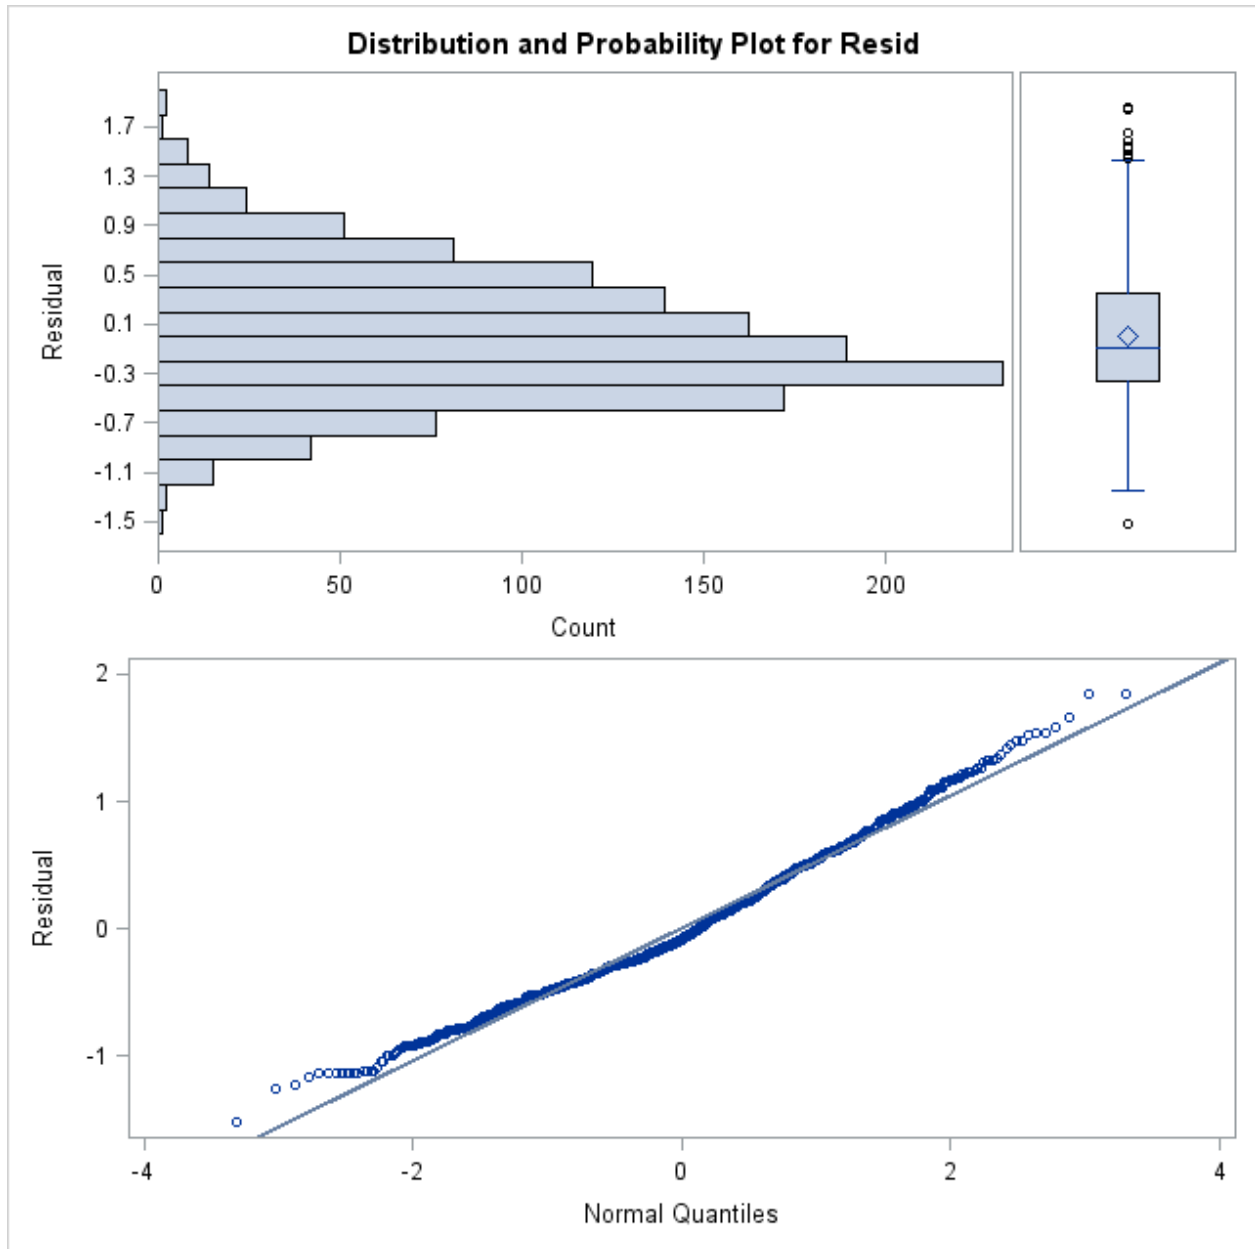

Supplement: 1746-6148-10-106-S9.pdf [file 1746-6148-10-106-S9.pdf]
